# Supplementary material
Source: MDPI journal article supplement (https://www.mdpi.com/2073-4441/15/24/4237)
Supplement: s1 [file s1]

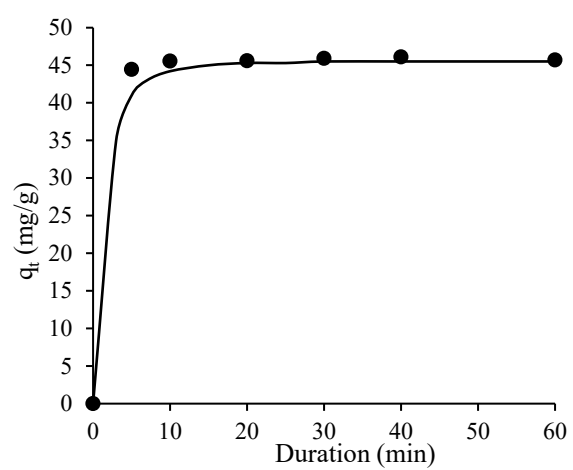

(a)

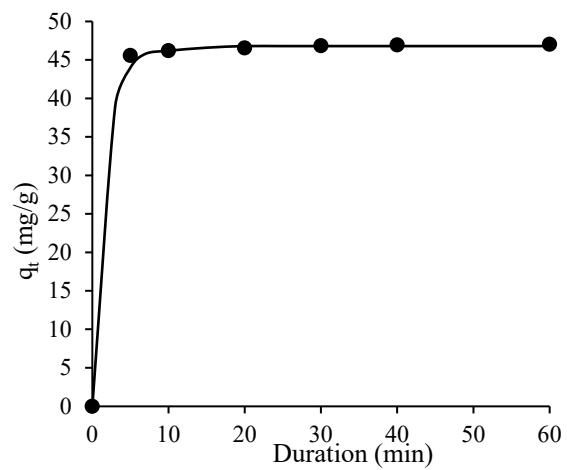

(b)

**Figure S1.** Graphs of experimental diclofenac adsorption kinetics at 20 °C temperature: (a) - on CLCS-0.21; (b) - on CLCS-0.33.
